1           **Cardiovascular Health Effects and Synthetic Cooling Agents in E-**  
2           **cigarettes Labeled as ‘clear’ Marketed in Massachusetts After the**  
3           **Tobacco Product Flavoring Ban**

4  
5  
6  
7 Erika T. Minetti MS<sup>1\*</sup>, Hanno C. Erythropel PhD<sup>2\*</sup>, Rachel Keith ANP, PhD<sup>3</sup>, Danielle R. Davis  
8 PhD<sup>4</sup>, Julie B. Zimmerman PhD<sup>2</sup>, Suchitra Krishnan-Sarin PhD<sup>4</sup>, Naomi M. Hamburg MD, MS<sup>1</sup>

9  
10  
11 \*Authors contributed equally

12  
13 <sup>1</sup>Evans Department of Medicine, Section of Vascular Biology, and Whitaker Cardiovascular  
14 Institute, Boston University School of Medicine, Boston, MA

15  
16 <sup>2</sup> Department of Chemical and Environmental Engineering, Yale University, New Haven,  
17 Connecticut

18 <sup>3</sup> University of Louisville School of Medicine, Louisville, KY

19 <sup>4</sup> Department of Psychiatry, Yale University School of Medicine, New Haven, Connecticut

20  
21 Word count: 783 including section headers.

22  
23 Corresponding Author:

24 Naomi M. Hamburg, MD

25 Whitaker Cardiovascular Institute

26 Boston University School of Medicine

27 72 East Concord St

28 Boston, MA 02118

29 617-638-7260

30 617-414-1563 (FAX)

31 [nhamburg@bu.edu](mailto:nhamburg@bu.edu)

## 33 **Abstract**

### 34 **Introduction**

35 Massachusetts (MA) enacted statewide regulation on all flavored tobacco products in June 2020.  
36 Thereafter, electronic cigarettes (e-cigarettes) labeled 'clear' emerged on the market. We aimed to  
37 combine cardiovascular health effects with chemical analysis of 'clear' e-cigarettes.

### 38 **Methods**

39 We measured acute changes in blood pressure and heart rate following a 10-minute structured use of  
40 participants' own e-cigarette, comparing 'clear' e-cigarette users with other flavored e-cigarette users and  
41 non-users. Chemical characterization and quantification of relevant flavorings and cooling agents (WS-3,  
42 WS-23) of 19 'clear'-labeled disposable e-cigarette liquids was carried out by GC/MS.

### 43 **Results**

44 After the ban, participants that used 'clear' labeled e-cigarettes increased from 0% to 21%. Increase in  
45 diastolic blood pressure and heart rate was significantly greater in 'clear' e-cigarettes users (n=22)  
46 compared to both non-'clear' flavored e-cigarette users (n=114) and non-users (n=72). We saw similar  
47 results in heart rate when comparing Juul e-cigarette and 'clear' users; Juul was used as a reference as  
48 synthetic coolants WS-3 or WS-23 were not detected in these.

49 All (19/19) 'clear' e-liquids were found to contain synthetic cooling agents WS-23 and/or WS-3, menthol  
50 (18/19), as well as other flavorings (12/19).

### 51 **Discussion**

52 The detected presence of menthol alongside other flavorings in tested 'clear' products is a direct violation  
53 of the MA flavored tobacco product regulation, warranting stricter monitoring for new products and

- 54 constituents. 'clear' e-cigarette use led to greater hemodynamic effects compared to other flavored e-
- 55 cigarettes and Juul, which raises questions about the effect of cooling agents on users.

56 **Introduction**

57 Flavored electronic cigarettes (e-cigarettes) appeal to youth/young adults and restricting access is a  
58 regulatory strategy to combat use. In June 2020, Massachusetts (MA) enacted a statewide regulation on  
59 “any flavored tobacco products,”<sup>1</sup> specifically prohibiting the sale of products with “characterizing flavor”  
60 and only exempts “tobacco taste or aroma.” The introduction of similar regulation in California led to the  
61 emergence of tobacco products that contain novel ingredients, such as odorless synthetic coolants,<sup>2</sup> which  
62 is currently under litigation.

63 After the MA flavor ban was enacted, e-cigarettes labeled as ‘clear’ became available. Though not always  
64 explicitly marketed as unflavored, the ‘clear’ labeling might suggest as such, and there have been limited  
65 investigations regarding composition and toxicity. We present the first study that combined untargeted  
66 chemical characterization to determine flavoring, as well as menthol and synthetic cooling agent presence  
67 in ‘clear’ e-liquids with examinations of the hemodynamic effects of acute exposure to ‘clear’ e-cigarettes.

68 **Methods**

69 The Cardiovascular Injury due to Tobacco Use (CITU) study is an ongoing observational cohort study  
70 evaluating the health effects of e-cigarettes in young adults. Blood pressure (BP) and heart rate (HR) were  
71 examined in healthy young adults (ages 18-45) before and after a 10-minute structured use of  
72 participants’ own e-cigarette product or breathing through a straw (non-user controls) in the morning  
73 following abstinence from food, caffeine (>8 hours), and from tobacco and exercise (>6 hours).<sup>3</sup> Changes  
74 in BP and HR measures were compared between users of ‘clear’ e-cigarettes (n=22), other non-‘clear’  
75 flavored e-cigarettes (n=114), and non-users (n=72).

76 For chemical analysis, 19 ‘clear’ disposables devices were purchased based on an online keyword search  
77 for ‘clear disposable’, including three brands reported by CITU participants (Crave, Luto, Space) between  
78 4/2024-5/2025, and Juul ‘Menthol’ and ‘Virginia Tobacco’ in March 2024. E-liquid from each device was

79 diluted and injected into a GC/MS for untargeted characterization, and into a GC/FID for quantification  
80 using commercially available standards following an established protocol.<sup>4</sup>

## 81 **Results**

82 Cohort data was collected 04/2019-05/2023: 'clear' users: n=22, age 21±3, 46% female, 68% sole e-  
83 cigarette use; non-'clear' flavored users: n=114, age 22±4, 45% female, 73% sole e-cigarette use; non-  
84 users: n=72, age 26±6, 54% female. Pre-ban, no 'clear' use was reported, whereas post-ban, 21% of  
85 participants used 'clear' and 79% used non-'clear' flavored products, consistent with ongoing access to  
86 flavored products. Pre-use BP and HR did not differ between groups. Following acute exposure, use of  
87 'clear' e-cigarettes resulted in a greater increase in diastolic BP and HR compared to both non-'clear'  
88 flavored e-cigarette use and non-use, with a trend towards a greater increase in systolic BP (Figure 1A). In  
89 a sensitivity analysis restricted to sole e-cigarette users, the findings were similar.

90 Chemical analysis of 'clear' e-liquids demonstrated the presence of synthetic cooling agents WS-23  
91 (19/19) and WS-3 (7/19), and menthol (18/19). In 12/19 products, other flavorings including menthone  
92 (peppermint flavor) carvone (spearmint), vanillin (vanilla), ethyl maltol (cotton candy), and  $\gamma$ -decalactone  
93 (peach) were detected (Figure 1B).

94 JUUL was the most common non-'clear' flavored product (n=43/114) and no synthetic coolants were  
95 detected among JUUL products (Figure 1B). In a secondary analysis comparing JUUL and 'clear' exposure,  
96 we observed that post-use, increases in heart rate remained higher in 'clear' users compared to JUUL  
97 users (8.9±7.4 vs 4.5±8.1, P=0.01), whereas the change in diastolic BP was not significantly different  
98 (8.9±7.1 vs 6.4±6.0, P=0.1).

## 99 **Discussion**

100 This study demonstrates that ‘clear’ e-cigarettes, which emerged following a tobacco product flavor ban  
101 in MA, contain significant levels of both menthol and synthetic, odorless cooling agents (WS-3, WS-23),  
102 and other flavorings. Exposure to ‘clear’ e-liquids, when compared with non-‘clear’ flavored e-liquids,  
103 induced greater increases in BP and HR, including increased HR when compared with JUUL products that  
104 did not contain synthetic coolants.

105 The detected presence of menthol alongside other flavorings in tested ‘clear’ products is a direct violation  
106 of the MA flavored tobacco product regulation. Further, synthetic coolants (which are not specifically  
107 mentioned in the MA law) may reduce tobacco/nicotine harshness, facilitate deeper inhalation, and  
108 enhance nicotine delivery,<sup>5</sup> which could help explain our hemodynamic findings and warrant their  
109 inclusion in tobacco flavor regulations. Notably, other countries have implemented restrictions on  
110 synthetic cooling agent use in combustible cigarettes.<sup>4</sup>

111 In conclusion, following the flavor ban in MA we observed the emergent use of new products by young  
112 adults that not only contained traditional and novel synthetic and odorless coolants, as well as other  
113 flavorings, but also produced differential hemodynamic effects when compared to other existing e-  
114 cigarettes. While this study is limited by chemical characterization of only ‘clear’ and JUUL e-liquids, and  
115 exposure only to the participants’ own products, our findings suggest that monitoring for new products  
116 and constituents including scientific evidence on their physiological and behavioral impacts are critically  
117 needed to maximize the impact of flavor bans and protect youth/young adults.

118 **Conflict of Interest Disclosures:** The authors declare no conflicts of interest.

119 **Funding/Support:** This work was supported by cooperative agreement U54DA036151 (Yale Tobacco  
120 Center of Regulatory Science) from the National Institute on Drug Abuse (NIDA) of the National Institutes  
121 of Health (NIH) and the Center for Tobacco Products of the US Food and Drug Administration (FDA).  
122 Additionally, this work was supported by the National Heart, Lung, and Blood Institute (NHLBI) of the NIH  
123 (U54 HL120163) and the American Heart Association (AHA) (20YVNR35500014).

124 **Role of the Funder/Sponsor:** The sponsors had no role in the design and conduct of the study; collection,  
125 management, analysis, and interpretation of the data; preparation, review, or approval of the manuscript;  
126 and decision to submit the manuscript for publication.

127 **Disclaimer:** The content is solely the responsibility of the authors and does not necessarily represent the  
128 views of the NIH, AHA or the FDA.

129 **Sources**

- 130 1. 2019 Tobacco Control Law | Mass.gov. Accessed December 19, 2023.  
131 <https://www.mass.gov/guides/2019-tobacco-control-law>
- 132 2. Jabba S V., Erythropel HC, Anastas PT, Zimmerman JB, Jordt SE. Synthetic Cooling Agent and  
133 Other Flavor Additives in “Non-Menthol” Cigarettes Marketed in California and Massachusetts  
134 After Menthol Cigarette Bans. *JAMA*. 2023;330(17):1689-1691. doi:10.1001/JAMA.2023.17134
- 135 3. Keith RJ, Fetterman JL, Riggs DW, et al. Protocol to assess the impact of tobacco-induced volatile  
136 organic compounds on cardiovascular risk in a cross- sectional cohort: Cardiovascular Injury due  
137 to Tobacco Use study. *BMJ Open*. 2018;8(3):e019850. doi:10.1136/BMJOPEN-2017-019850
- 138 4. Jabba S V., Erythropel HC, Torres DG, et al. Synthetic Cooling Agents in US-marketed E-cigarette  
139 Refill Liquids and Popular Disposable E-cigarettes: Chemical Analysis and Risk Assessment.  
140 *Nicotine Tob Res*. 2022;24(7):1037-1046. doi:10.1093/NTR/NTAC046
- 141 5. Siddiqi TJ, Rashid AM, Siddiqi AK, et al. Association of Electronic Cigarette Exposure on  
142 Cardiovascular Health: A Systematic Review and Meta-Analysis. *Curr Probl Cardiol*. 2023;48(9).  
143 doi:10.1016/J.CPCARDIOL.2023.101748

144





Figure

A

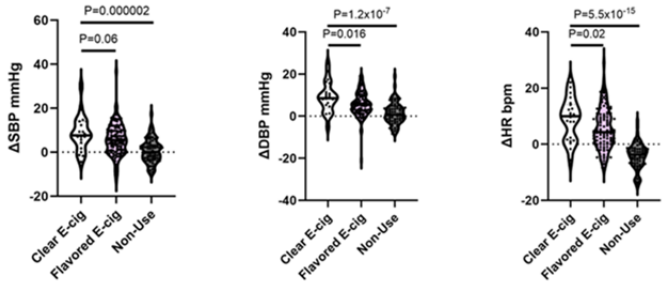

B

| Product name                                                             | Nicotine   | Menthol    | WS-3       | WS-23      | Other flavorants detected by GC/MS <sup>a</sup>                                                                   |
|--------------------------------------------------------------------------|------------|------------|------------|------------|-------------------------------------------------------------------------------------------------------------------|
| Results shown as average (SD); N=3, unit (ug compound) per (mg e-liquid) |            |            |            |            |                                                                                                                   |
| *Crave Clear 5%                                                          | 52.4 (0.7) | 2.7 (0.0)  | -          | 28.4 (0.6) | γ-decalactone, ethyl maltol, vanillin                                                                             |
| *Crave Ultra Clear 5%                                                    | 52.2 (0.9) | 6.6 (0.2)  | 6.4 (0.2)  | 27.4 (0.6) | -                                                                                                                 |
| *Crave+kik New Clear 5%                                                  | 52.5 (0.6) | 6.8 (0.2)  | 6.4 (0.1)  | 28.5 (0.6) | -                                                                                                                 |
| *Luto Clear 2.8%                                                         | 28.4 (0.4) | 5.1 (0.2)  | -          | 15.3 (0.2) | carvone                                                                                                           |
| *Luto Smooth Clear 5%                                                    | 50.0 (0.5) | 0.5 (0.0)  | 4.6 (0.1)  | 34.4 (0.4) | -                                                                                                                 |
| *Space Max Pro 5%                                                        | 37.7 (0.2) | 0.8 (0.0)  | 1.8 (0.0)  | 11.2 (0.1) | carvone, ethyl maltol, eucalyptol, menthone, vanillin                                                             |
| Elfbar Clear 5%                                                          | 39.1 (1.1) | 3.4 (0.2)  | -          | 30.4 (1.0) | γ-decalactone, ethyl maltol, vanillin                                                                             |
| Pacha syn Clear 5%                                                       | 51.2 (1.6) | 2.0 (0.4)  | -          | 26.5 (1.2) | -                                                                                                                 |
| Fire Float Clear 0%                                                      | n.d.       | n.d.       | -          | 18.1 (0.5) | ethyl maltol                                                                                                      |
| Flum Pebble Clear 5%                                                     | 47.1 (1.6) | 4.0 (0.2)  | 13.3 (0.4) | 37.0 (1.4) | -                                                                                                                 |
| Flum Float Clear 5%                                                      | 50.2 (0.9) | 4.0 (0.1)  | 25.2 (0.7) | 23.8 (1.1) | -                                                                                                                 |
| Esco Bars Clear 5%                                                       | 53.0 (1.0) | 6.6 (0.3)  | -          | 19.3 (0.7) | carvone                                                                                                           |
| Puffbar Clear 5%                                                         | 36.5 (0.1) | 0.6 (0.1)  | -          | 15.6 (0.7) | γ-decalactone, ethyl maltol, vanillin                                                                             |
| Fogger Ultra Clear 5%                                                    | 34.7 (0.7) | 4.5 (0.5)  | -          | 20.1 (0.7) | benzyl alcohol, carvone, menthone                                                                                 |
| Hotbox Clear 5%                                                          | 40.5 (0.9) | 4.2 (0.1)  | 13.6 (0.3) | 29.4 (1.0) | -                                                                                                                 |
| Hitt Infinite Clear 5%                                                   | 36.5 (0.5) | 1.6 (0.1)  | -          | 17.2 (0.5) | menthone                                                                                                          |
| Ijoy Bar Clear 5%                                                        | 32.7 (0.3) | 1.4 (0.0)  | -          | 27.5 (0.4) | carvone, γ-decalactone, γ-dodecalactone, ethyl maltol, isopropyl benzoate, menthone, vanillin, vanillin PG acetal |
| Vozol Clear 5%                                                           | 37.9 (1.0) | 4.1 (0.1)  | -          | 18.7 (0.6) | carvone, ethyl maltol, isopropyl benzoate, isopulegol, menthone, piperitone, vanillin                             |
| Podjuice Hyde IQ Clear 5%                                                | 50.3 (1.5) | 9.2 (1.0)  | -          | 13.8 (0.7) | eucalyptol, isopulegol, menthone                                                                                  |
| Non-“Clear” Products                                                     |            |            |            |            |                                                                                                                   |
| Juul Menthol 5% 2019                                                     | 53.0 (0.1) | 10.0 (0.7) | -          | -          | -                                                                                                                 |
| Juul Menthol 5% 2024                                                     | 53.8 (1.8) | 10.6 (0.6) | -          | -          | -                                                                                                                 |
| Juul Virginia Tob. 5% 2024                                               | 48.3 (0.3) | -          | -          | -          | β-damascenone                                                                                                     |

<sup>a</sup> “Clear” product with reported use by CITU study participants. <sup>b</sup> As identified using the National Institute of Standards and Technology (NIST) database v.2.2; characteristic odors of reported compounds: benzyl alcohol: sweet, carvone: spearmint, γ-decalactone: peach, γ-dodecalactone: peach, ethyl maltol: cotton candy, eucalyptol: minty, isopropyl benzoate: floral, isopulegol: minty, menthone: minty, piperitone: minty, vanillin: vanilla, vanillin propylene glycol (PG) acetal: vanilla, β-damascenone: woody, herbal

Figure: (A) Acute effects of ‘clear’ e-cigarettes on Blood Pressure (systolic: SBP; diastolic: DBP) and Heart Rate (HR). Change in SBP, DBP, and HR differed across the three groups of users: ‘clear’ labeled e-cigarettes, flavored e-cigarette, and non-use by one way ANOVA (all P<0.001), post-hoc comparisons using LSD between ‘clear’ e-cig and other groups as noted. Statistical analyses were performed using SPSSv.27. (B) Disposable ‘clear’ and non-‘clear’ products tested, quantified contents for nicotine, menthol, synthetic cooling agents WS-3 and WS-23, and a list of other flavorants detected by non-targeted GC/MS analysis.
